# Supplementary material
Source: publisher figshare collection journal article supplement (https://acs.figshare.com/ndownloader/files/4068295)
Supplement: Supplementary file 1 [file 4068295]

## Supporting Information

### Mechanisms of the Deactivation of SAPO-34 Materials with Different Crystal Sizes Applied as MTO Catalysts

Weili Dai<sup>1</sup>, Guangjun Wu<sup>1</sup>, Landong Li<sup>\*1</sup>, Naijia Guan<sup>1</sup>, and Michael Hunger<sup>\*2</sup>

<sup>1</sup> Key Laboratory of Advanced Energy Materials Chemistry (Ministry of Education), College of Chemistry, Nankai University, Tianjin 300071, P.R. China

<sup>2</sup> Institute of Chemical Technology, University of Stuttgart, 70550 Stuttgart, Germany

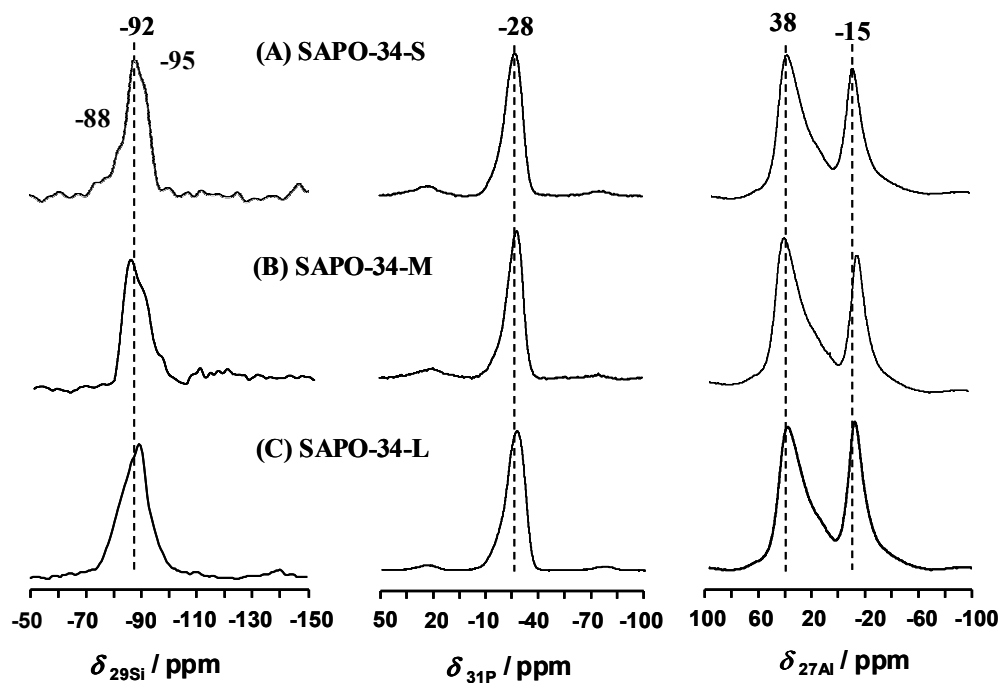

**Figure S1.**  $^{29}\text{Si}$ ,  $^{31}\text{P}$ , and  $^{27}\text{Al}$  MAS NMR spectra of the calcined and rehydrated SAPO-34-S (top), SAPO-34-M (middle), and SAPO-34-L (bottom) materials under study. These spectra were recorded as described in Section 2.1., fifth paragraph.
